1                    **Individual recognition in a jumping spider**

2                                            *(Phidippus regius)*

3 Christoph D. Dahl<sup>1,2,\*</sup> and Yaling Cheng<sup>2,\*</sup>

4  
5  
6 <sup>1</sup> Institute of Biology, University of Neuchâtel, Neuchâtel, Switzerland

7 <sup>2</sup> Graduate Institute of Mind, Brain and Consciousness, Taipei Medical University, Taipei,  
8 Taiwan

9  
10  
11 \* joint senior authorship

12 † corresponding author: Christoph D. Dahl <[christoph.d.dahl@gmail.com](mailto:christoph.d.dahl@gmail.com)>

## 13 Summary

14 Individual recognition is conceptually complex and computationally intense, leading to  
15 the general assumption that this social knowledge is solely present in vertebrates with  
16 larger brains, while miniature-brained animals in differentiating societies eschew the  
17 evolutionary pressure for individual recognition by evolving computationally less demanding  
18 class-level recognition, such as kin, social rank, or mate recognition. Arguably, this social  
19 knowledge is restricted to species with a degree of sociality (sensu [1], for a review [2]).  
20 Here we show the exception to this rule in an asocial arthropod species, the jumping spider  
21 (*Phidippus regius*). Using a habituation - dishabituation paradigm, we visually confronted  
22 pairs of spatially separated spiders with each other and measured the 'interest' of one  
23 spider towards the other. The spiders exhibited high interest upon initial encounter  
24 of an individual, reflected in mutual approach behaviour, but adapted towards that  
25 individual when it reoccurred in the subsequent trial, indicated by their preference of  
26 staying farther apart. In contrast, spiders exhibited a rebound from habituation, reflected  
27 in mutual approach behaviour, when a different individual occurred in the subsequent  
28 trial, indicating the ability to tell apart spiders' identities. These results suggest that *P.*  
29 *regius* is capable of individual recognition based on long-term social memory.

## 30 Keywords

31 Recognition memory, long-term social memory, individual recognition, flexible learning,  
32 arthropod, invertebrate, salticid, jumping spider, *Phidippus regius*

## 33 Main text

34 Recognising individuals is a complex cognitive process requiring flexible learning and  
35 recognition memory. Arthropod species possessing the social ability of individual recognition  
36 would, thus, stand in stark contrast to the commonly accepted notion that animals  
37 with smaller brains are cognitively less advanced due to reduced computational power  
38 of nervous systems with smaller and fewer neurons [3]. And yet, there is evidence  
39 for an arthropod species displaying face learning [4] and long-term social memory [5].  
40 That is, a social wasp species (*Polistes fuscatus*) showed mammal-like face learning  
41 [4, 6], arguably providing social benefits by reducing aggression and stabilizing social  
42 interactions. With this, being one of the few reported cases of individual recognition in  
43 arthropods (also see [7]), it is considered unlikely that asocial arthropod species would  
44 evolve such complex cognitive processes. The reasons being high energy consumption,  
45 long processing times and, thus, increased predation risk that would never be outweighed  
46 by the few social encounters between individuals and the additional survival benefit  
47 [2, 8]. The general consensus, thus, is that a certain degree of sociality sensu Wilson  
48 [1] is required for the emergence of individual recognition [8]. Here, we challenge this  
49 consensus: In a naturalistic experimental procedure, we put to the test the ability of  
50 individual recognition in a notoriously asocial and miniature-brained arthropod species,  
51 a member of the *Salticidae* family, the jumping spider (*Phidippus regius*).  
52 In a first step, we assess the ability of *P. regius* to individually recognise other members  
53 of its species, commonly referred to as individual recognition [9] or individuation of  
54 conspecifics [10]. For this purpose, we used a habituation - dishabituation procedure,  
55 where, in general terms, one individual habituates to the presence of another individual  
56 in its close proximity and dishabituates when, after a short phase of visual separation,  
57 another individual is present in close proximity, assuming that the one individual is  
58 capable of discriminating the identities of the two individuals it was confronted with  
59 [11, 12]. In other terms, with this habituation - dishabituation paradigm we expect to  
60 see that the rebound in 'interest' following changes in a spider's identity is greater than  
61 the rebound in 'interest' following a repetition of identity. To experimentally control  
62 the animal pairs, we placed the individuals in separate containers with one side and the  
63 top panel being transparent. We then pairwise confronted the individuals by placing  
64 the containers such that the transparent sides faced each other in the following fashion:

65 Individual A and individual B were exposed to each other for 7 minutes, triggering an  
66 initial 'interest' in each other, and were then visually separated by means of an opaque  
67 slider for 3 minutes. Subsequently, they were either exposed to the same individual again  
68 (A vs B, *habituation* trial) for 7 minutes, or to a different individual (A vs C, or B vs  
69 D, *dishabituation* trial) for 7 minutes, followed by a 3-minute period of visual separation.  
70 The relative interest is quantified by approximating spatial distances between the spider  
71 pairs in the xy-plane, where high interest is reflected in smaller values (i.e. spiders  
72 go close) and low interest in larger values (spiders stay apart). Therefore, under the  
73 assumption that the spiders are capable of individuating each other, we predict that  
74 in the *habituation* condition, involving the same individuals, the relative interest in each  
75 other decreases and, hence, spiders' distances increase (Figure 1a-c; 'Habituation', dashed  
76 line: towards maximal distance; solid line: medium distance), while in the *dishabituation*  
77 condition, involving a different individual, the relative interest in each other increases and  
78 spiders approach each other, hence, distances decrease (Figure 1a-c; 'Dishabituation').  
79 We divided a total of 20 individuals into five groups of four individuals each. Each  
80 individual of each group was exposed to the three group members in both habituation and  
81 dishabituation trials, resulting in six trials per session, equivalent to one hour of recording.  
82 We repeated this procedure twice, resulting in 18 trials across three sessions and an exact  
83 repetition of a given trial (and pairing of individuals) in 1-hour intervals (for a detailed  
84 description of the procedure see Materials and Methods and Tables 1-2). We found that  
85 *habituation* and *dishabituation* trials (i.e. predictor variable *condition*) were significantly  
86 dissociated as a function of inter-individual distances (i.e. predictor variable *distance*),  
87 leading to a significant improvement of model fitting the interaction of the predictors  
88 *distance* and *condition* (LRT:  $\chi^2_{\Delta 3} = 63.66$ ,  $p < 0.001$ ; Figure 2a, Supplementary Table  
89 1): *dishabituation* trials (blue discs) showed a greater proportion of close-distance values  
90 than *habituation* trials (red discs), whereas *habituation* trials showed a greater proportion  
91 of far-distance values. The interaction between the predictors *distance* and *condition*  
92 further significantly interacted with the predictor *session*, modulating the level of the  
93 dissociative effect of *condition* over the progression of the testing period, showing the  
94 strongest modulation in session 1 and the weakest modulation in session 3 (LRT:  $\chi^2_{\Delta 6} =$   
95 34.14,  $p < 0.001$ ; Figure 2a, Supplementary Table 1, exemplar trial: Figure 1 d-f). The  
96 systematic dissociation of distance values between *habituation* and *dishabituation* trials

97 suggests that *P. regius* possesses the ability to individuate conspecifics.  
98 The question arises whether *P. regius*'s decreasing interest over session repetitions is  
99 caused by a general fatigue effect due the prolonged testing procedure or whether, in later  
100 testing sessions, *P. regius* actually recognises the current individual after having seen it  
101 before at least once (when encountering it again in session 2) or twice (when encountering  
102 it again in session 3) and, thus, would not dishabituate any longer. Such recognition  
103 capability would further emphasise the role of long-term memory representations in the  
104 individuation of conspecifics, due to the prolonged retention interval beyond the minute  
105 range into the hours. In a second step, we therefore assessed the extent to which a  
106 presentation of an individual novel and unseen across the three experimental sessions  
107 would trigger a rebound in interest at the end of session 3, henceforth referred to as  
108 *dishabituation [long-term]* trials, as opposed to the *dishabituation* trials of sessions 1-3,  
109 henceforth referred to as *dishabituation [short-term]* trials (see Table 3). If such rebound  
110 occurs, we conclude that the habituation across sessions is the result of recognition of  
111 repeatedly presented individuals and not the result of a fatigue effect due to prolonged  
112 testing procedures. In other words, such rebound would suggest a 'cognitive' fatigue  
113 towards seeing the same 'old' individuals, subserved by long-term memory formation,  
114 rather than a 'physical' fatigue effect. To this end, we re-ran the experiment in an  
115 additional 16 spiders, arranged to four groups and added a memory *dishabituation [long-term]*  
116 trial at the end of session 3. The memory *dishabituation [long-term]* trials were generated  
117 by cross-combining individuals from two groups (group 1: A, B, C, D; group 2: E, F,  
118 G, H; Table 3), which were run in parallel, at the end of session 3, resulting in novel  
119 pairings (A - E, B - G, C - F, D - H). We replicated our previous results and found a  
120 dissociation of the factors *distance* and *condition* (LRT:  $\chi^2_{\Delta 3} = 29.52$ ,  $p < 0.001$ ; Figure  
121 2b, Supplementary Table 2), showing a greater proportion of close-distance values for  
122 dishabituation (blue discs) than for habituation trials (red discs) and a greater proportion  
123 of far-distance values for habituation than for dishabituation trials. Critically, we also  
124 found that the *dishabituation [long-term]* trials at the end of session 3 elicited a rebound  
125 in interest that exceeded the rebound in the *dishabituation [short-term]* trials of session  
126 3 by far, reflected in the interaction of *condition* (i.e. *dishabituation [short-term]* vs  
127 *dishabituation [long-term]*) and *distance* ( $F(3,127) = 3.91$ , sum sq. = 0.92, mean sq.  
128 = 0.31,  $p < 0.01$ , Figure 2b (right subfigure, white diamonds), exemplar trials: Figure

129 1g-i, j-l). Thus, the habituation across sessions reflects a decrease in interest for the same  
130 repeatedly presented individuals on the basis of long-term memory capabilities.

131 Our findings show, firstly, that *P. regius* recognised individuals to which it was exposed  
132 to for a short period of 7 minutes and that reoccurred after a visual separation period  
133 of 3 minutes. Secondly, *P. regius* habituated in the long-term, i.e. 1 hour and 2 hours  
134 after initial presentation of a given individual. Thirdly, despite long-term habituation, *P.*  
135 *regius* showed an unprecedented rebound in interest towards an entirely novel individual,  
136 ruling out a physical fatigue effect in favour of a cognitive fatigue on the basis of long-term  
137 social memory capabilities. For these reasons, our results are the first to suggest that  
138 *P. regius*, an asocial arthropod species, possesses long-term memory, which allows it to  
139 individuate conspecifics and recognise novel individuals.

140

141 Recognising members of one's own species is crucial for survival and a requirement for  
142 various social behaviours. Individual recognition allows the receiver animal to distinguish  
143 between friend and foe, to identify a mating partner, its offspring or a kin member.  
144 Individual recognition is achieved via the production of individually-distinct features (e.g.  
145 visual) or signals (e.g. acoustic) by the sender and extracting those features and signals  
146 by the receiver [13]. Individual recognition bears particular significance for *social* animal  
147 species mainly in three contexts: territoriality, aggressive competition and parental care  
148 [9]. However, jumping spiders, as many other spider species, are solitary and aggressive  
149 towards conspecifics, raising the question about the biological relevance of individual  
150 recognition in *P. regius*: One of the few social instances in the life of a jumping spider  
151 occurs during reproductive communication, encompassing a complex visual courtship  
152 display of coordinated movement patterns of the body and bodily features. It is believed  
153 that the typical colouration of the appendages (*Chelicerae*) and the colouration and  
154 facial hair characteristics serve as important features for species and sex classification  
155 in jumping spiders and as a general indicator about the quality of an individual as  
156 a mating partner [14, 15]. Hence, colouration (sender) and the ability to distinguish  
157 certain colours (receiver) seem to be sufficiently beneficial to sexual selection [16, 14].  
158 Similarly, in aggressive interactions, often due to territorial disputes, fighting abilities  
159 are largely associated with the size and colour of the *Chelicerae* [16, 17], rendering  
160 territoriality and aggressive competition needless as an ultimate explanation [18] for

161 individual recognition in *P. regius*. Some jumping spiders exhibited parental care [19],  
162 protecting the nest through the spiderlings' first molt. One particular jumping spider  
163 (*Toxus magnus*) has been documented to provide a nutritious milk-like substance to  
164 the spiderlings, which compares functionally and behaviourally to lactation in mammals  
165 [20]. Whether individual recognition solves a survival problem in this context, is however  
166 questionable. The remaining solitary behaviours of *P. regius* give little additional reason  
167 to predict that individual recognition is a requirement for survival, setting the minimal  
168 recognition needs (*Minimum needs hypothesis* [21, 2]) at the basic-level of classification  
169 [22], e.g. colour-based distinction, size assessment of *Chelicerae*. Moreover, the neural  
170 implementation of a subordinate-level classification [22] system that operates at the level  
171 of abstraction required for a more detailed classification, such as individual recognition,  
172 involves specialised processing in dedicated neural correlates [23]. For all these reasons it  
173 is therefore more likely to assume that the ability of recognising conspecifics is related to  
174 *P. regius*'s general learning capabilities via pleiotropy, also referred to as the 'generalised  
175 learning hypothesis' [21]. For example, salticids' rather complex foraging and navigation  
176 strategies [24, 25, 26], requiring high degrees of learning and adaptability, may translate  
177 into the flexible learning ability required for recognising conspecifics, at a level of abstraction  
178 more fine-grained than their minimum recognition needs [13]. In other words, while for  
179 *social* animal species, including social arthropod species [6, 4, 7], there is an ultimate  
180 explanation [18] addressing the function (or adaptation) of individual recognition, we  
181 cannot conclusively infer the survival benefits gained by individual recognition in *P.*  
182 *regius*. Instead we put forward the idea that individual recognition in *P. regius* is a  
183 byproduct of fairly sophisticated cognitive processing capabilities. Critically, individual  
184 recognition relies on recognition memory, a form of long-term memory, where a previously  
185 encountered event or entity, here an individual, stored as memory representation is  
186 neurally activated upon re-experiencing that event or entity [27]. Such memory representation  
187 might well serve as guidance to *Portia fimbriata*, allegedly the most intelligent jumping  
188 spider, when, after scanning the access route to a prey target, it follows the path to  
189 the prey under lack of visual control [28]. In our study, we demonstrated retrieval of  
190 information from memory representations in various ways: First, *P. regius*'s dissociative  
191 behavioural responses upon perceiving an individual for a second time in succession as  
192 opposed to perceiving a different individual suggests recognition of individually distinct

193 characteristics or cues, which manifest in solid memory representations. Moreover, *P.*  
194 *regius* systematically reduced the overall interest over a series of repeated exposure to the  
195 same individuals at a 1-hour presentation interval to the point where it became indifferent  
196 to the presented individual, suggesting that *P. regius* successfully retrieves memory-stored  
197 information at least one hour after memory consolidation. Thirdly, *P. regius*'s interest in  
198 novelty was restored at the end of session 3 upon perception of individuals that had not  
199 been encountered before, highlighting that the loss of interest in the long-term was not  
200 due to a general physical fatigue, but a 'cognitive' fatigue, i.e. to literally perceive the  
201 same individuals over and over again. A novel individual, consequently, did not activate  
202 memory representations of individuals, and led, as a response, to dishabituation, a fortiori  
203 amplifying the notion of memory representation in *P. regius*.  
204 Together, our study challenges the notion of spiders being stimulus-response driven  
205 automata, by not only contributing to an increasing body of evidence that spiders and  
206 salticids in particular produce a wide spectrum of intelligent behaviour [29], but by  
207 pinpointing the presence of two fundamentally important mechanisms for any higher  
208 cognitive processing: flexible learning and recognition memory. The key building blocks  
209 of these mechanisms are representations, mental images of external entities, that are  
210 not present to the sense organs, allowing more elaborate information processing, such  
211 as in complex decision making and goal-directed behaviour. The existence of which in  
212 arthropods in general and spiders in particular triggers rethinking of miniature brain  
213 cognition [29].

## 214 **Materials and methods**

### 215 *Subjects*

216 Our subjects were 36 jumping spiders (*Phidippus regius*), kept individually in enclosures  
217 (7 x 7 x 12 cm) at room temperature (21 - 25°C) and supplied with a moist water-pad,  
218 exchanged every other day, and two small-sized cockroaches (*Shelfordella lateralis*) per  
219 week. All spiders were adult laboratory-bred and had no direct encounters with conspecifics  
220 during adulthood. Behavioural enrichment [30] was provided by means of climbing and  
221 nesting structures (i.e., natural wood branch) and by interaction with human caretakers  
222 and experimenters during handling and maintenance procedures. In Experiment 1,



223 spiders were assigned to five experimental groups, three of which contained females, two  
224 of which males; in Experiment 2, spiders were assigned to four experimental groups, i.e.  
225 two groups per sex.

226

### 227 *Apparatus*

228 In the following we describe how pairs of spiders were brought into direct visual contact  
229 under controlled conditions and in a manner that allows to reassign individuals easily and  
230 without interruption to form novel pairings. To this end, we built a cubical experimental  
231 arena of 60 by 46 by 65cm dimensions (L x W x H), consisting of white polypropylene  
232 plastic panels, mounted in a frame of T-slotted aluminium profiles (20 Series; Misumi  
233 Group Inc., Bunkyo City, Tokyo, Japan). Two LED light sources (Mettle® SL400,  
234 45W, 2100lm, 350 x 250mm surface area, Mettler Photographic Equipment Corporation,  
235 Changzhou, China) were placed outside the cubicle at 25cm distance from the side panels  
236 of the cubicle, illuminating the inside of the cubicle uniformly. We also mounted two  
237 FLIR® 1.3MP, Mono Blackfly USB3 cameras with a 1/2" CMOS sensor (BFS-U3-13Y3M-C,  
238 FLIR® Integrated Imaging Solutions, Inc, 12051 Riverside Way, Richmond, BC, Canada)  
239 equipped with 8mm UC Series lenses from Edmund Optics® (Stock #33-307, Edmund  
240 Optics®, Barrington, New Jersey, USA) on T-slotted aluminium profiles, facing downwards  
241 onto the arena surface at a distance of 60cm. For each spider we 3D-printed a white  
242 container with outer dimensions (L x W x H) of 7 x 7 x 5cm and inner dimensions of 6.3  
243 x 6.3 x 4.5cm. The upper side of the container and one of the four side walls were made  
244 of a transparent .5mm thick acrylic sheet. While the acrylic sheet on the upper side of  
245 the container was screwed onto the side walls of the container, the acrylic sheet on one of  
246 the sides of the container can be lifted up to open the container, allowing easier transfer  
247 of the spider from the home enclosure.

248

### 249 *Procedure*

250 In Experiment 1, each group involved four same-sex spiders, with each spider being placed  
251 inside a container prior to the experiment. During the experiment, the spiders remained  
252 in their own container. We allowed the spiders sufficient time (10-15min) to get used to  
253 the new environment. We then placed the containers of the four spiders such that the  
254 transparent side walls of two containers were facing each other, resulting in two pairs

255 of spiders with direct visual contact to each other. During the process of arranging the  
256 containers and prior to the initiation of every new trial, visual contact was prevented  
257 by an occluder slid between the transparent side walls of the containers. Each trial was  
258 initiated by removing this occluder, allowing visual contact. For simplicity, let the four  
259 individuals be symbolised by the letters 'A', 'B', 'C', and 'D': An arrangement of trials  
260 where each individual is opposed to each other individual is described in Table 1. To tease  
261 apart, whether or not *P. regius* was capable of visually discriminating other individuals  
262 two types of trials were required: (a) a *habituation* trial, where the same individual was  
263 presented in the trial preceding the current trial, and (b) a *dishabituation* trial, where a  
264 different individual was presented in the trial preceding the current trial. Therefore, every  
265 *dishabituation* trial followed a *habituation* trial, forming a *habituation* or *dishabituation*  
266 phase, respectively, as shown in Table 2. A trial, e.g. A - B (and in parallel C - D),  
267 lasted for 7 minutes allowing the spiders to visually inspect each other, before isolating  
268 the spiders visually for 3 minutes with a non-transparent white occluder, fully covering  
269 the transparent side wall. After the occluder phase, another exposure phase of 7 minutes  
270 was initiated, which consisted of either the same individual (*habituation* trial) or another  
271 individual (*dishabituation* trial) than the individual in the preceding trial. During each  
272 trial, the individuals distance to each other was quantified at 10Hz temporal resolution,  
273 and taken as a measure reflecting the 'interest' in each other: Short distances between  
274 individuals signal greater 'interest' in each other, while large distances signal reduced  
275 'interest' in each other. We predict a dissociation of distances between *habituation* and  
276 *dishabituation* trials. With the outlined procedure (Table 2), we can form sequences of  
277 exposure phases, where each first of two exposure phases is a habituation phase, and  
278 every second of those exposure phases is a dishabituation phase and at the same time  
279 a habituation phase for the subsequent exposure phase. In this manner, we created a  
280 trial list, containing 12 trials in total, six of which result in *habituation* phases and six of  
281 which result in *dishabituation* phases (Table 2). This session of trials was repeated twice,  
282 resulting in a total of 36 trials per experiment. Each experiment lasted 180 min, where  
283 each trial contained 7 min exposure and 3 min visual separation. Each group of spiders  
284 was subjected to this protocol. Two amendments were introduced in Experiment 2: (a)  
285 We ran two groups of four individuals in parallel, and (b) additional *cross-group* trials  
286 were introduced at the end of session 3. This resulted in a modified procedure described

287 in Table 3.

288

### 289 *Data logging and analysis*

290 Camera control and image acquisition were done using Matlab (Mathworks<sup>®</sup>, Natick,  
291 Massachusetts, USA) and the image acquisition and processing toolboxes. The frame  
292 rate was set to 10Hz. Cameras were placed perpendicular to the xy-plane at a distance of  
293 about 60cm from the ground. The lens aperture was set to f/4, allowing a sufficient depth  
294 of field. Analysis was done with Matlab (Mathworks<sup>®</sup>, Natick, Massachusetts, USA). We  
295 pre-processed the video recordings by segmenting the spider body from the background  
296 in each frame using functions for image intensity adjustment, image enhancement, image  
297 binarization and image properties measurement to extract the largest available 'region',  
298 the spider body, and its centroid. For each trial we approximated the distance between  
299 the individuals in the xy-plane as a function of time, using the Euclidean distance  
300 weight function based on the centroid coordinates of the two individuals. We then  
301 pooled the distance values of each trial into 4 equally-sized and non-overlapping bins  
302 (bin centers [mm]: [20, 60, 100, 140]; bin size 40mm; maximal distance  $\approx$  160mm) and  
303 calculated the proportion of time spent at a given distance. Each bin was normalised  
304 by the total number of events. Differences between proportions were then calculated  
305 for every trial comparison according to Tables 2, 3: For instance, the proportions of  
306 time spent at a given distance for individual A in trial 1 was subtracted from the  
307 proportions of time spent at a given distance for individual A in trial 2, resulting in  
308 an assessment for the relative rebound of interest following a repetition of exposure to  
309 the same spider B (*habituation*). Subsequently, the proportions of time spent at a given  
310 distance for individual A in trial 2 was subtracted from the proportions of time spent  
311 at a given distance for individual A in trial 3, resulting in an assessment for the relative  
312 rebound of interest following changes in spider's identity (*dishabituation*). We used  
313 linear mixed-effects models, where the differences in proportions served as the dependent  
314 variable. We fitted two separate models for each experiment (*Full model 1* and *2*), and  
315 followed a commonly accepted model fitting procedure [31]: To fully account for the  
316 dependent variable, we fitted three predictor variables: (1) The bin number ([1 to 4]),  
317 reflecting a discretised distance measure and henceforth referred to as factor *distance* ([1  
318 to 4]), (2) the *session* of comparisons ([1, 2, 3]), as outlined in the Procedure above (Table

319 2, 3), and (3) the *condition*, referring to whether the given comparison was a *habituation*  
320 or *dishabituation* comparison. We also fitted all two-way interactions between the three  
321 main predictors: *distance:session*, *distance:condition*, and *session:condition*, as well as the  
322 three-way interaction *distance:session:condition*. Of particular interest are the two-way  
323 interaction between the factors *distance* and *condition*, since we predict a modulation  
324 of *distance* values by *condition* as a function of *distance*, and the three-way interaction  
325 between the factors *distance*, *condition* and *session*, since we predict a modulation of  
326 *condition* as a function of *distance* which becomes weaker over time and repetitions, i.e.  
327 *session*. We further defined *sex* of the subjects and *subject* as random factors in all  
328 models. We fitted a linear mixed-effects model (fitlme function in Matlab) with normal  
329 error structure and identity link function to our data set. We then created a null model  
330 for each corresponding full model, which consisted of the similar structure as the full  
331 model, however leaving only *distance* as fixed effect, while preserving all random effects.  
332 Using likelihood ratio test (LRT), we compared the null models with the corresponding  
333 full models. Assuming a significant improvement for the full model over the null model,  
334 the non-significant interaction terms were removed from the full model, reaching a model  
335 containing only significant interaction terms and both significant and non-significant main  
336 effects [32, 33], henceforth referred to as the final model. Evaluation of fixed effect were  
337 on the basis of the final models and are referred to as the *Final model 1* (Experiment  
338 1), and *Final model 2* (Experiment 2). This procedure resulted in the following models  
339 (Wilkinson notation):

340

341 *Final model 1* and *2*:

342 'Response ~ 1 + Distance + Session + Condition + Distance:Condition + ...

343 Distance:Session:Condition + (1|Sex) + (1|Subject)'

344

345 An additional analysis of variance was performed comparing the *dishabituation [long-term]*  
346 trials at the end of session 3 with the *dishabituation [short-term]* trials from session 3  
347 (Table 3) as a function of *distance*. No statistical methods were used to predetermine  
348 sample size. The experiments were not randomized. The investigators were not blinded  
349 to allocation during experiments and outcome assessment.

## References

- 350
- 351 [1] Wilson, E. O. *Sociobiology: The new synthesis* (Harvard University Press, 2000).
- 352 [2] Gherardi, F., Aquiloni, L. & Tricarico, E. Revisiting social recognition systems in  
353 invertebrates. *Animal cognition* **15**, 745–762 (2012).
- 354 [3] Niven, J. E. & Farris, S. M. Miniaturization of nervous systems and neurons. *Current*  
355 *Biology* **22**, R323–R329 (2012).
- 356 [4] Sheehan, M. J. & Tibbetts, E. A. Specialized face learning is associated with  
357 individual recognition in paper wasps. *Science* **334**, 1272–1275 (2011).
- 358 [5] Sheehan, M. J. & Tibbetts, E. A. Robust long-term social memories in a paper  
359 wasp. *Current Biology* **18**, R851–R852 (2008).
- 360 [6] Tibbetts, E. A. Visual signals of individual identity in the wasp *polistes fuscatus*.  
361 *Proceedings of the Royal Society of London. Series B: Biological Sciences* **269**,  
362 1423–1428 (2002).
- 363 [7] Dreier, S., Van Zweden, J. S. & D’Ettorre, P. Long-term memory of individual  
364 identity in ant queens. *Biology Letters* **3**, 459–462 (2007).
- 365 [8] Dale, J., Lank, D. B. & Reeve, H. K. Signaling individual identity versus quality:  
366 a model and case studies with ruffs, queleas, and house finches. *The American*  
367 *Naturalist* **158**, 75–86 (2001).
- 368 [9] Tibbetts, E. A. & Dale, J. Individual recognition: it is good to be different. *Trends*  
369 *in ecology & evolution* **22**, 529–537 (2007).
- 370 [10] Bonatti, L., Frot, E., Zangl, R. & Mehler, J. The human first hypothesis:  
371 Identification of conspecifics and individuation of objects in the young infant.  
372 *Cognitive psychology* **44**, 388–426 (2002).
- 373 [11] Humphrey, N. K. Vision in a monkey without striate cortex: a case study. *Perception*  
374 **3**, 241–255 (1974).
- 375 [12] Dahl, C. D., Logothetis, N. K. & Hoffman, K. L. Individuation and holistic processing  
376 of faces in rhesus monkeys. *Proceedings of the Royal Society B: Biological Sciences*  
377 **274**, 2069–2076 (2007).

- 378 [13] Yorzinski, J. L. The cognitive basis of individual recognition. *Current Opinion in*  
379 *Behavioral Sciences* **16**, 53–57 (2017).
- 380 [14] Zhou, W. *et al.* Sexual selection on jumping spider color pattern: investigation with  
381 a new quantitative approach. *Behavioral Ecology* (2021).
- 382 [15] Hill, G. E., Hill, G. E., McGraw, K. J., Kevin, J. *et al.* *Bird coloration: mechanisms*  
383 *and measurements*, vol. 1 (Harvard University Press, 2006).
- 384 [16] Lim, M. L., Land, M. F. & Li, D. Sex-specific uv and fluorescence signals in jumping  
385 spiders. *Science* **315**, 481–481 (2007).
- 386 [17] Tedore, C. & Johnsen, S. Weaponry, color, and contest success in the jumping spider  
387 *lyssomanes viridis*. *Behavioural processes* **89**, 203–211 (2012).
- 388 [18] Tinbergen, N. On aims and methods of ethology. *Zeitschrift für tierpsychologie* **20**,  
389 410–433 (1963).
- 390 [19] Gardner, B. T. Observations on three species of phidippus jumping spiders (araneae:  
391 Salticidae). *Psyche* **72**, 133–147 (1965).
- 392 [20] Chen, Z. *et al.* Prolonged milk provisioning in a jumping spider. *Science* **362**,  
393 1052–1055 (2018).
- 394 [21] Wiley, R. Specificity and multiplicity in the recognition of individuals: implications  
395 for the evolution of social behaviour. *Biological Reviews* **88**, 179–195 (2013).
- 396 [22] Rosch, E., Mervis, C. B., Gray, W. D., Johnson, D. M. & Boyes-Braem, P. Basic  
397 objects in natural categories. *Cognitive psychology* **8**, 382–439 (1976).
- 398 [23] Weiner, K. S. & Grill-Spector, K. The evolution of face processing networks. *Trends*  
399 *in cognitive sciences* **19**, 240–241 (2015).
- 400 [24] Jakob, E. M., Skow, C. D., Haberman, M. P. & Plourde, A. Jumping spiders associate  
401 food with color cues in a t-maze. *The Journal of Arachnology* **35**, 487–492 (2007).
- 402 [25] Jakob, E., Skow, C. D. & Long, S. M. Plasticity, learning and cognition. *Spider*  
403 *behavior: Flexibility and versatility* (2011).

- 404 [26] Skow, C. D. & Jakob, E. M. Jumping spiders attend to context during learned  
405 avoidance of aposematic prey. *Behavioral Ecology* **17**, 34–40 (2006).
- 406 [27] Norman, K. A. & O'Reilly, R. C. Modeling hippocampal and neocortical  
407 contributions to recognition memory: a complementary-learning-systems approach.  
408 *Psychological review* **110**, 611 (2003).
- 409 [28] Tarsitano, M. S. & Jackson, R. R. Araneophagic jumping spiders discriminate  
410 between detour routes that do and do not lead to prey. *Animal Behaviour* **53**,  
411 257–266 (1997).
- 412 [29] Jackson, R. R. & Cross, F. R. Spider cognition. *Advances in insect physiology* **41**,  
413 115–174 (2011).
- 414 [30] Carducci, J. P. & Jakob, E. M. Rearing environment affects behaviour of jumping  
415 spiders. *Animal Behaviour* **59**, 39–46 (2000).
- 416 [31] Dobson, A. J. & Barnett, A. G. *An introduction to generalized linear models* (CRC  
417 press, 2018).
- 418 [32] Hector, A., Von Felten, S. & Schmid, B. Analysis of variance with unbalanced data:  
419 an update for ecology & evolution. *Journal of animal ecology* **79**, 308–316 (2010).
- 420 [33] Forstmeier, W. & Schielzeth, H. Cryptic multiple hypotheses testing in linear models:  
421 overestimated effect sizes and the winner's curse. *Behavioral ecology and sociobiology*  
422 **65**, 47–55 (2011).

## 423 **Acknowledgements**

424 We are grateful for the financial support by the Swiss National Science Foundation  
425 (PZ00P3.154741), the Startup-funding of Taipei Medical University (108-6402-004-112)  
426 and the Taiwan Ministry of Science and Technology research grants (110-2311-B-038-002,  
427 112-2410-H-038-027) awarded to CDD. We thank Guillaume Dezechache, Niall W. Duncan,  
428 Olivier Pascalis, Tzu-Yu Hsu, Werner Müller and Timothy J. Lane for suggestions and  
429 comments on the manuscript.

## 430 **Author contributions**

431 CDD: study design, data collection, analysis and interpretation, writing article, provision  
432 of necessary tools; YC: data collection, writing article, provision of resources.

## 433 **Competing interest**

434 The authors declare that they have no competing interest. The authors have no affiliations  
435 with or involvement in any organization or entity with any financial interest, or non-financial  
436 interest in the subject matter or materials discussed in this manuscript.

## 437 **Additional information**

438 All authors have seen and approved the manuscript. The manuscript has not been  
439 accepted or published elsewhere. Supplementary Information is available for this paper.  
440 Correspondence and requests for materials should be addressed to Christoph D. Dahl.  
441 Codes and materials are available (<https://osf.io/gpnct/>).

## 442 **Ethical approval**

443 According to Taiwan's Animal Protection Act, issued by the Council of Agriculture  
444 (Executive Yuan), experiments on invertebrates are allowed to be conducted without  
445 any special permission in Taiwan.



446 **Tables**

Table 1: *Pairwise comparisons.*

| Trial | Pair 1 | Pair 2 |
|-------|--------|--------|
| 1     | A - B  | C - D  |
| 2     | A - C  | B - D  |
| 3     | B - C  | A - D  |

447

Table 2: *Procedure of Experiment 1.*

| Trial      | Pair 1 | Pair 2 |               |                  |
|------------|--------|--------|---------------|------------------|
| 1          | A - B  | C - D  | } Habituation | } Dishabituation |
| 2          | A - B  | C - D  |               |                  |
| 3          | A - C  | B - D  | } Habituation |                  |
| 4          | A - C  | B - D  |               |                  |
| 5          | B - C  | A - D  | } Habituation |                  |
| 6          | B - C  | A - D  |               |                  |
| ...        |        |        |               | } Dishabituation |
| 3 sessions |        |        |               |                  |

448

Table 3: *Pairwise comparisons as habituation and dishabituation trials.*

| Trial      | Group 1 |        | Group 2 |        |               |                               |
|------------|---------|--------|---------|--------|---------------|-------------------------------|
|            | Pair 1  | Pair 2 | Pair 1  | Pair 2 |               |                               |
| 1          | A - B   | C - D  | E - F   | G - H  | } Habituation | } Dishabituation [short-term] |
| 2          | A - B   | C - D  | E - F   | G - H  |               |                               |
| 3          | A - C   | B - D  | E - G   | F - H  | } Habituation |                               |
| 4          | A - C   | B - D  | E - G   | F - H  |               |                               |
| 5          | B - C   | A - D  | F - G   | E - H  | } Habituation |                               |
| 6          | B - C   | A - D  | F - G   | E - H  |               |                               |
| ...        |         |        |         |        |               | } Dishabituation [long-term]  |
| 3 sessions |         |        |         |        |               |                               |
| 7          | A - E   | B - G  | C - F   | D - H  |               |                               |

449

450 **Figure**

451 **Figure 1**

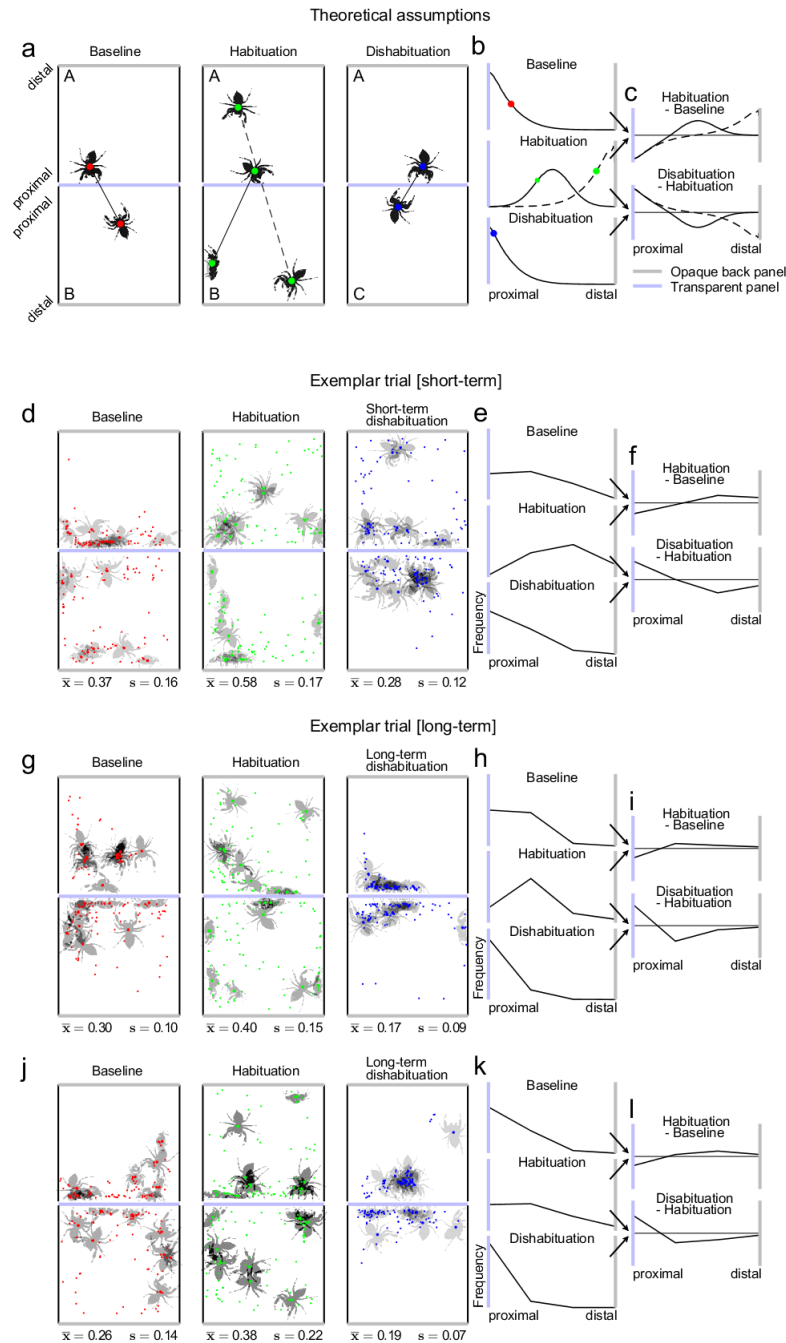

452 Figure caption 1: Theoretical assumptions and exemplar trials. a-c Predicted spider

453 distances for *baseline* (red dots), *habituation* (green dots) and *dishabituation* comparisons  
454 (blue dots). Habituation can manifest either in equal inter-spider distances (solid line)  
455 as in the *baseline* comparison or in an increase of distances (dashed line). What is  
456 referred to as *baseline* in this context is the *dishabituation* trial of the previous comparison  
457 (see Table 2). Distance samples are predicted to fall into distributions as shown in b.  
458 Contrasts between *baseline*, *habituation* and *dishabituation* comparisons would result in  
459 distributions as shown in c. d-f An exemplar trial consisting of *baseline*, *habituation*  
460 and *dishabituation* comparisons from the first session of trials is shown. The *short-term*  
461 *dishabituation* comparison shows a decrease of inter-spider distances, indicating increasing  
462 interest in a different individual than the previously perceived one (*habituation* comparison).  
463 g-i; j-l Two exemplar trials from the third session of Experiment 2 are shown, where a  
464 presentation of an individual novel and unseen across the three experimental sessions  
465 triggered a great rebound in interest (i,l, 'Dishabituation - habituation').

466 **Figure 2**

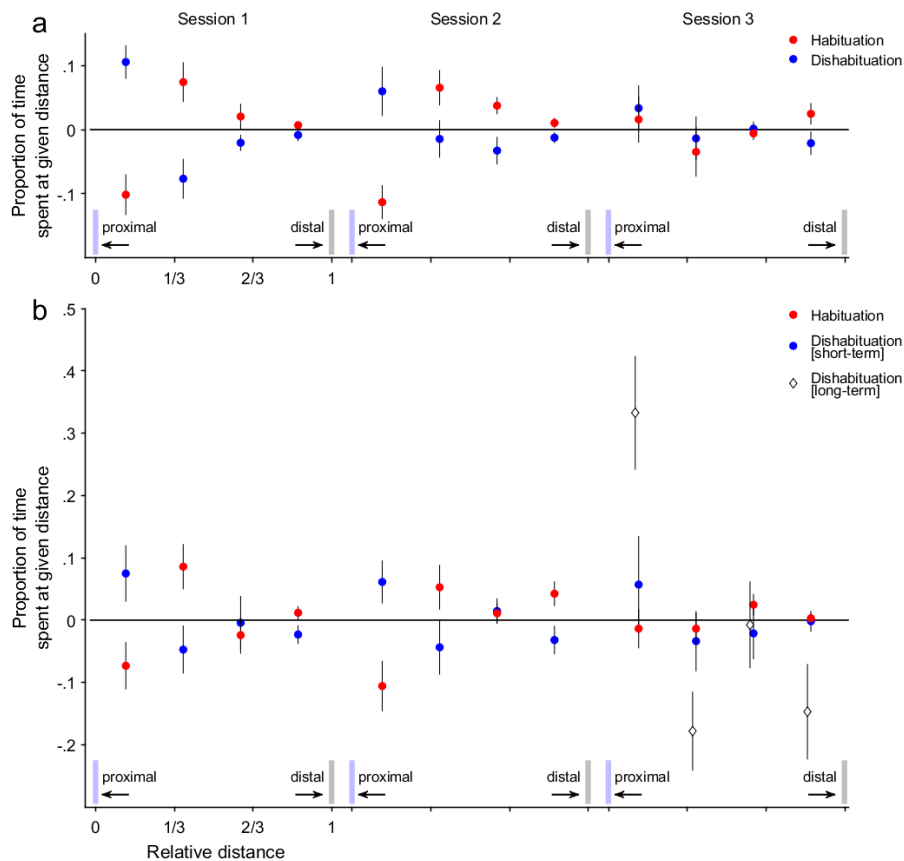

467 Figure caption 2: The relative change in distance between pairs of individuals, upon  
468 being confronted with the same individual as in the preceding trial (habituation trial; red  
469 discs) or a different individual from the individual in the preceding trial (dishabituation  
470 trial; blue discs). Each panel refers to an experiment (panel a. for Experiment 1; panel  
471 b. for Experiment 2), consisting of three sessions of trials. The dependent data is shown  
472 as the proportion of time spent at a given distance binned into 4 equally spaced bins.  
473 The x-axis labels refer to the proportional distances from the transparent acrylic sheet,  
474 ranging from 'proximal' to 'distal'; the y-axis refers to the proportion of time spent at a  
475 given distance, i.e. the relative number of samples that fall into a given bin. Discs show  
476 the mean proportion across all individuals (i.e. 20 for Experiment 1; 16 for Experiment  
477 2). The whiskers indicate the standard errors of the mean. White diamonds in the lower  
478 right subfigure b show the long-term dishabituation trials. Light blue bars indicate the  
479 side of the transparent acrylic sheet (proximal); grey bars indicate the back wall of the

480 container (distal).

### Theoretical assumptions

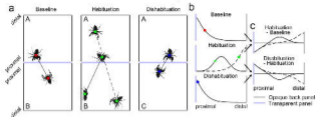

### Exemplar trial (short-term)

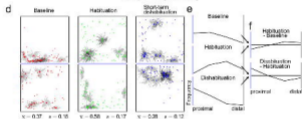

$\alpha = 0.37$   $\kappa = 0.16$

$\alpha = 0.58$   $\kappa = 0.17$

$\alpha = 0.28$   $\kappa = 0.12$

### Exemplar trial (long-term)

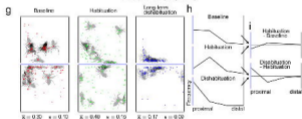

$\alpha = 0.30$   $\kappa = 0.10$

$\alpha = 0.48$   $\kappa = 0.10$

$\alpha = 0.17$   $\kappa = 0.00$

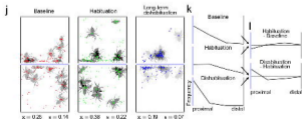

$\alpha = 0.25$   $\kappa = 0.14$

$\alpha = 0.38$   $\kappa = 0.22$

$\alpha = 0.19$   $\kappa = 0.07$

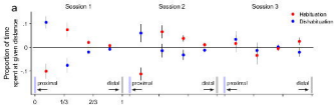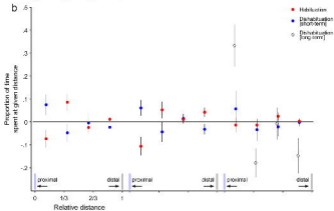

Source: https://www.biorxiv.org/content/biorxiv/early/2023/11/17/2023.11.17.567545.full.pdf?%3Fcollection=
